# Supplementary material
Source: Springer Nature journal article supplement (https://www.springermedizin.de/resource/supplementary/12884_2012_555_MOESM5_ESM.pdf/9457958)

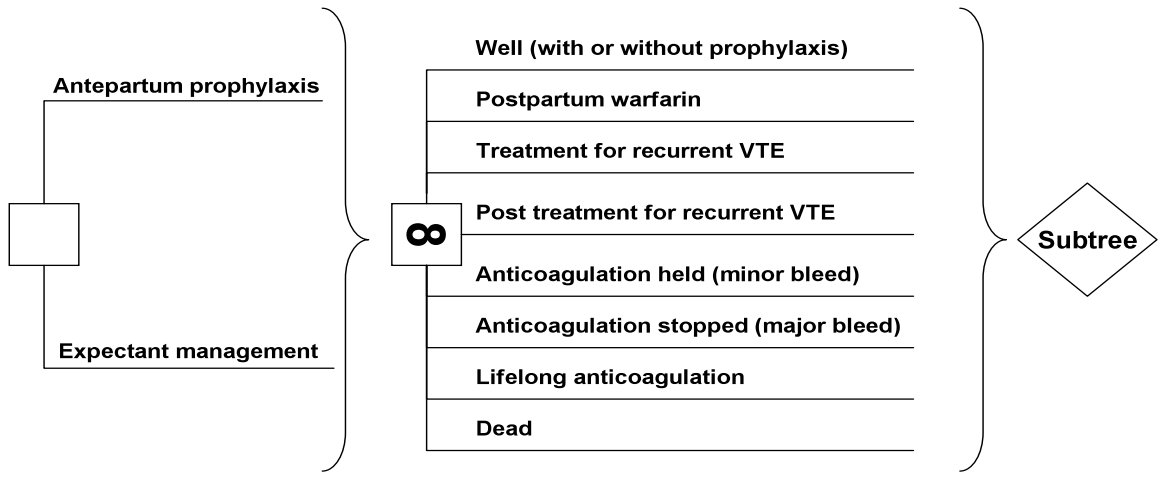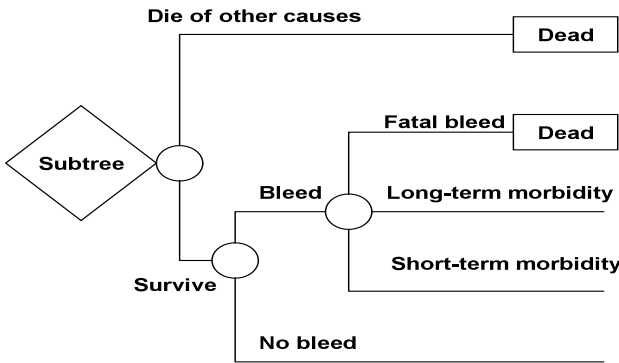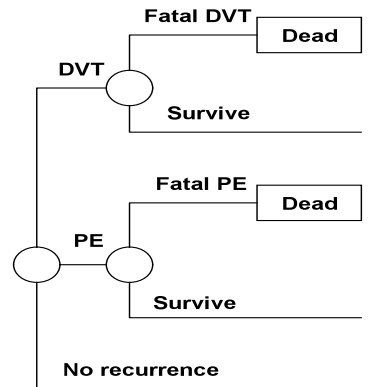

Supplement: MOESM5 [file 9457958]
